1 Observations on the interactions of mammals and birds with badger (*Meles meles*) dung  
2 pits at a site used by a single social group in an urban area

3 Morgan Hughes<sup>1</sup> & Scott Brown

4 <sup>1</sup> Corresponding Author: m.hughes3@wlv.ac.uk

5 **Key Words:** badger, behaviour, foraging, latrines, surveys,

6 *Word count: 2011*

7

8 Abstract

9 During a monitoring study of a single social group of badger (*Meles meles*) at an urban site,  
10 incidental observations were noted of mammalian and avian species feeding within and  
11 removing material from *M. meles* dung pits. In response to these observations, infra-red  
12 cameras were deployed at dung pits for a 10-week period to document the nature, timing and  
13 frequency of these behaviours. Cameras were triggered a total of 954 times by a total of nine  
14 mammal and 12 bird species. Harvesting of material accounted for 28 % of latrine-associated  
15 behaviours. Results may have implications for disease transmission and the efficacy of  
16 badger surveys, particularly in areas where brown rats are prevalent.

17 Introduction

18 The diet of the *M. meles* changes throughout the year as the species exhibits behavioural  
19 plasticity with regard to foraging, switching from a grain-based diet in summer to a largely  
20 fruit- and worm-based diet in autumn (Cheeseman & Neal 1998). *M. meles* digestive systems  
21 do not effectively process cellulose, suberin or lignin (Cheeseman & Neal 1998) and as such,  
22 undigested plant material can remain intact within faecal matter. Such material represents a

23 readily available potential food source for foraging animals which is frequently renewed and  
24 deposited in a predictable place, as *M. meles* will re-use dung pits persistently (Roper, 2010).  
25 A single social group of *M. meles* at an urban Local Nature Reserve (LNR) in Walsall in the  
26 West Midlands was monitored using infra-red (IR) cameras by the authors from 2013 to  
27 2018. Following incidental observations of mammalian and avian species apparently feeding  
28 within and removing material from dung pits, a 10-week study was undertaken to monitor  
29 activity around active dung pits to document the nature, timing, and frequency of the  
30 behaviour.

### 31 *The Site*

32 The study site is a 13-hectare LNR situated in a fully urban context in Walsall in the West  
33 Midlands. The setts comprise a main sett (six entrances), an annex (two entrances), and  
34 several outliers and subsidiaries supporting a single social group of *M. meles* of  
35 approximately 13 individuals prior to annual dispersal (Hughes and Brown, 2017).

36 Classification of setts follows that of Kruuk (1978) and Thornton (1988). All setts experience  
37 regular anthropogenic disturbance including noise and vibration from nearby roads, industry,  
38 schools and sports grounds, walkers, dogs and cyclists. The main sett has been documented  
39 by the authors and local wildlife crime officers to have been subject to malicious disturbance  
40 including sett-blocking and attempted badger-baiting.

### 41 Methods

#### 42 *Settings*

43 Five Bushnell HD Aggressor E2 Low-glow Trophycam Infra-red (IR) cameras were  
44 deployed facing either individual dung pits or latrine areas. Dung pits were selected based on  
45 known use by *M. meles* (i.e. those subject to deposition of faeces during the previous week)

46 in areas away from public footpaths to reduce risk of human interference or camera theft.  
 47 Cameras were deployed with no overlapping fields of view, set to record on PIR trigger, at  
 48 high sensitivity, recording 20-second videos at 720p, with a 3-second delay. Batteries were  
 49 changed when there was 1/3 battery power left or less. The 16 GB memory cards were  
 50 formatted in-unit to improve write speeds (Wearn & Glover-Kapfer 2017). Cameras were  
 51 checked weekly as per guidelines of a two-week checking schedule with an increased  
 52 frequency in areas of high human activity (Ancrenaz et al. 2012). The survey comprised a  
 53 total of 296 trap nights (Table 1) separated into 10 weekly segments commencing on  
 54 27/08/2017, corresponding to ISO week 35 (International Organization for Standardisation,  
 55 2017)). Each trap ‘day’ began at 00:00:00 hrs and ended at 23:59:59 hrs.

56 *Table 1: Camera deployment & trap nights*

| Location | Description/deployment                                                                                                                     | Camera | Dates Deployed          | Nights |
|----------|--------------------------------------------------------------------------------------------------------------------------------------------|--------|-------------------------|--------|
| 1        | Deployed at active dung pit in latrine area adjacent to the main sett.                                                                     | 1      | 27/08/2017 – 05/11/2017 | 70     |
| 2a       | Deployed at an active dung pit in latrine area adjacent to the main sett until dung pit fell out of use.                                   | 2      | 27/08/2017 – 16/10/2017 | 50     |
| 2b       | Re-deployed to a recently used dung pit close to an intermittently active outlier                                                          | 2      | 17/10/2017 – 05/11/2017 | 20     |
| 3        | Deployed at regularly used boundary dung pit along a perimeter fence.                                                                      | 3      | 27/08/2017 – 5/11/2017  | 70     |
| 4        | Deployed at active, central latrine area close to main sett with wide angle of three visible dung pits until pits fell out of regular use. | 4      | 23/09/2017 – 05/11/2017 | 43     |
| 5a       | Deployed at recently used dung pit close to a subsidiary sett until dung pit fell out of use.                                              | 5      | 23/09/2017 – 18/10/2017 | 25     |
| 5b       | Re-deployed at new active dung pit in a latrine area near an active outlier                                                                | 5      | 18/10/2017- 05/11/2017  | 18     |

57 *Data Management*

58 For each time the cameras were triggered by animal movement, recording a video file  
 59 (hereafter referred to as a ‘trigger’) the date, time, species, number of individuals and  
 60 behaviour were recorded. Behaviours were classified (see **Table 2**) as either  
 61 non-Latrine-Associated Behaviour (nLABs) comprising Commuting, Foraging, Caching and  
 62 Camera Interaction or Latrine-Associated Behaviour (LABs) comprising Investigating,  
 63 Toileting, Scent-marking and Harvesting.

64 *Table 2: Ethogram of Behaviour Categories and Definitions*

| Behaviour Group                                     | Behaviour Category | Definition                                                                                                                     |
|-----------------------------------------------------|--------------------|--------------------------------------------------------------------------------------------------------------------------------|
| <b>nLABs</b><br>(non-Latrine-Associated Behaviours) | Commuting          | uninterrupted movement through field of view of camera, showing no interaction with dung pits, immediate environment or camera |
|                                                     | Foraging           | behaviour associated with food-seeking                                                                                         |
|                                                     | Caching            | burying of food items                                                                                                          |
|                                                     | Camera Interaction | direct interaction with camera trap                                                                                            |
| <b>LABs</b><br>(Latrine-Associated Behaviours)      | Investigating      | interaction with a dung pit not seen to be associated with Toileting, squat-marking, eating or stealing from it                |
|                                                     | Harvesting         | foraging within a dung pit, eating within pit and/or carrying away faeces                                                      |
|                                                     | Toileting          | urinating or defecating on or in a dung pit                                                                                    |
|                                                     | Scent Marking      | squat-marking or spraying for purposes of olfactory communication                                                              |

65  
 66 It was not always possible to determine if an animal entering a dung pit was Harvesting due  
 67 to the sightline of the camera or the direction of the animal’s egress. In the absence of direct  
 68 evidence of Harvesting, such events were categorised as ‘Investigating’.

69 *Analysis*

70 The statistical significance in differences in activity levels at the main sett between baseline  
 71 and post-Toileting periods was calculated, using a  $\chi^2$  test in SPSS (IBM Corp., 2016) based  
 72 on trigger numbers over 21 consecutive days at the main sett.

73 Results

74 Cameras were triggered by animals 954 times during the study, by a total of nine mammal  
 75 species and 12 bird species. nLABs accounted for 78 % of triggers and LABs for 22 % of  
 76 triggers (**Table 3**). nLABs comprised triggers of 45 % Commuting, 27 % Foraging, 4 %  
 77 Caching and 1 % Camera Interaction. Only LABs were examined in detail. LABs comprised  
 78 14 % Investigating, 6 % Harvesting, 2 % Toileting and 1 % Scent-marking behaviours.

79 *Table 3: Breakdown of Trigger Categorisation*

| Behaviour                 | No of Triggers | % of Triggers | % of Group Triggers |
|---------------------------|----------------|---------------|---------------------|
| <i>Commuting</i>          | 432            | 45%           | 58 % of nLAB        |
| <i>Foraging</i>           | 257            | 27%           | 35 % of nLAB        |
| <i>Caching</i>            | 42             | 4%            | 6 % of nLAB         |
| <i>Camera Interaction</i> | 11             | 1%            | 2 % of nLAB         |
| <i>Investigating</i>      | 132            | 14%           | 62 % of LAB         |
| <i>Harvesting</i>         | 60             | 6%            | 28 % of LAB         |
| <i>Toileting</i>          | 14             | 2%            | 7 % of LAB          |
| <i>Scent Marking</i>      | 6              | 0.6%          | 2.8 % of LAB        |

80 *Latrine Associated Behaviours*

81 Toileting occurrences were recorded 17 times, with 11 of those attributed to *M. meles* and the  
 82 remainder being red fox (*Vulpes vulpes*), domestic cat (*Felix silvestris*) and dunnoek  
 83 (*Prunella modularis*) with four, one and one occurrences, respectively). Harvesting of

84 material accounted for 28 % of LAB triggers. Of those, 82 % were by mammals comprising  
85 77 % by brown rat (*Rattus norvegicus*), 3 % by grey squirrel (*Sciurus carolinensis*) and 2 %  
86 by wood mouse (*Apodemus sylvaticus*). Avian species accounted for 18 % of Harvesting  
87 triggers, comprising 13 % by magpie (*Pica pica*), and 2 % each by chaffinch  
88 (*Fringilla coelebs*), dunnock and wren (*Troglodytes troglodytes*).  
89 There was a variability in Harvesting behaviour (**Figure 1**) with Harvesting representing  
90 21 %, 30 % and 17 % of triggers in weeks 35, 37 and 38, respectively (with zero Harvesting  
91 activity being observed in week 36 due to camera failure). Lower levels of Harvesting (less  
92 than 5 % of triggers) took place during weeks 39 through 42, increasing again in weeks 43  
93 and 44 to 6 % and 7 %, respectively.

94

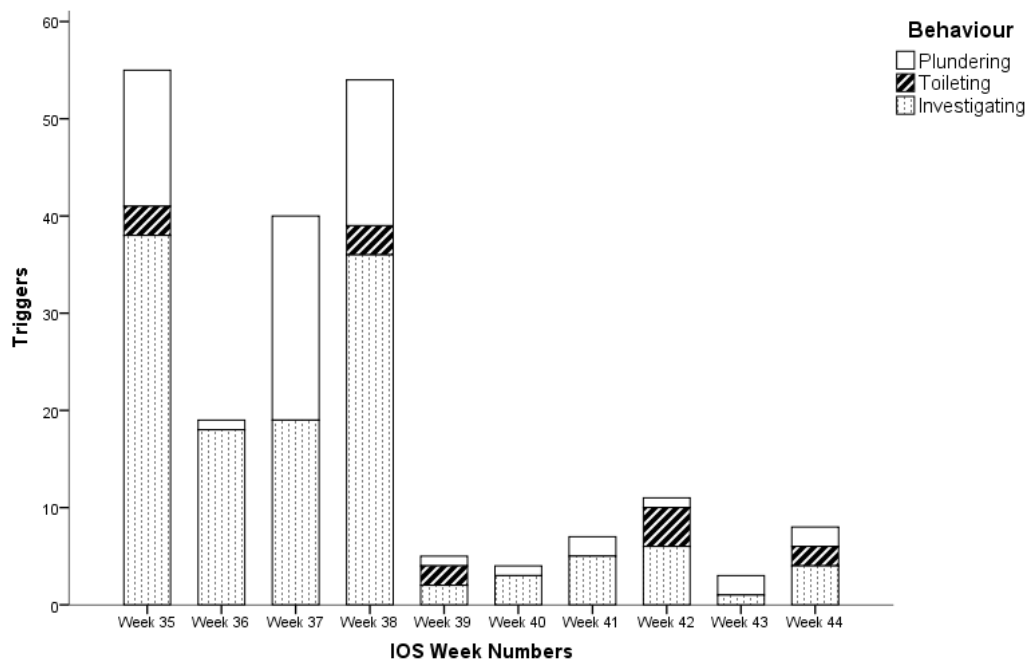

95

96

97

Figure 1: Triggers by Behaviour per week of the year (IOS, 2017)

98 *Post-Toileting Activity*

99 Activity levels (all behaviours by all species) underwent an increase in the 24-hour period  
100 following Toileting events (**Figure 2**), with subsequent reduction in activity in the following  
101 24-hour period down to a baseline of below 10 triggers per day over a 21-day period at the  
102 main sett in which four Toileting events were documented. This increase from baseline to  
103 post-Toileting activity (**Figure 3, Figure 4**) was subject to  $\chi^2$  analysis indicating that this is  
104 unlikely to have occurred by chance ( $p < 0.001$ ).

105

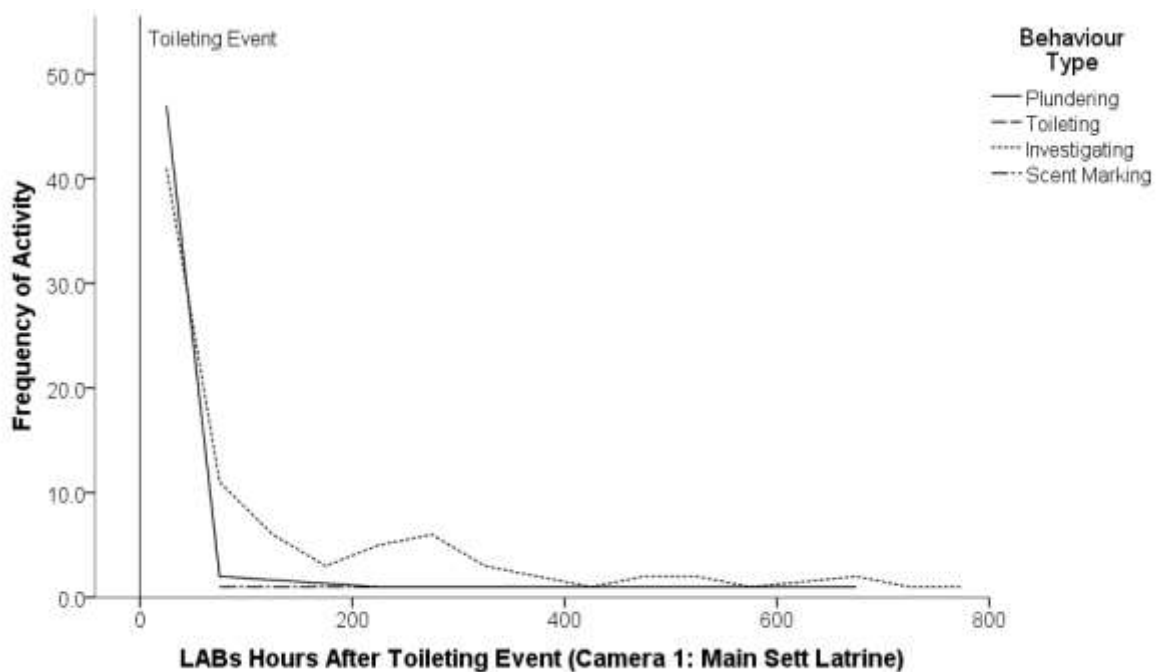

106

107 *Figure 2: nLABs activity levels in hours after Toileting event/faecal deposit (triggers by all*  
108 *species at main sett, camera 1)*

109

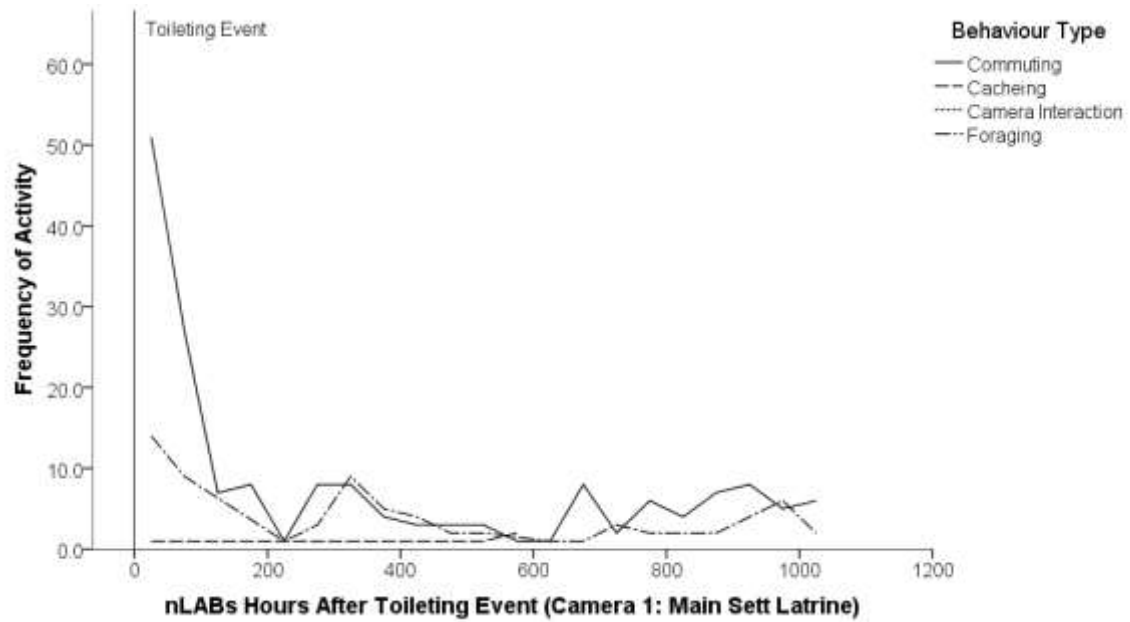

110

111 *Figure 3: nLABs activity levels in hours after Toileting event/faecal deposit (triggers by all*  
112 *species at main sett, camera 1)*

113

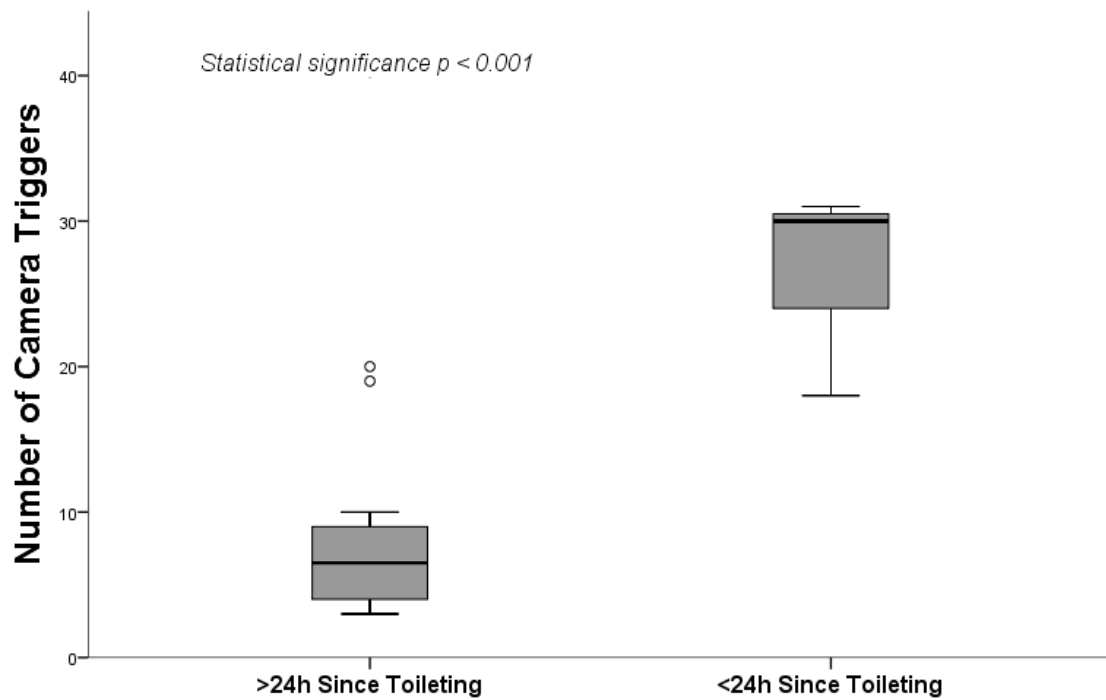

114

115 *Figure 4: Box plots showing difference in activity levels at baseline (on days with >24 hours*  
116 *since faecal deposit) compared with days <24 hours since faecal deposit.*



117 *Toileting vs. Harvesting*

118 The majority (80 %) of *M. meles* Toileting activity took place between 03:00 and 05:30; the  
119 majority (85 %) of Harvesting activity by *R. norvegicus* took place between 08:00 and 09:00.  
120 On average, Harvesting commenced within two to six hours after faecal deposit and persisted  
121 until up to nine hours after deposit, with the majority of Harvesting happening in 'events' with  
122 multiple trips taking place to plunder a dung pit for faeces until the food resource was  
123 depleted, with subsequent investigatory trips to the dung pits. During one such event, 28  
124 separate trips were recorded to a single dung pit by (presumed to be the same) adult male *R.*  
125 *norvegicus*. This is considered likely to have emptied the latrine of all solid faeces (**Plate 1,**  
126 **Plate 2**).

127

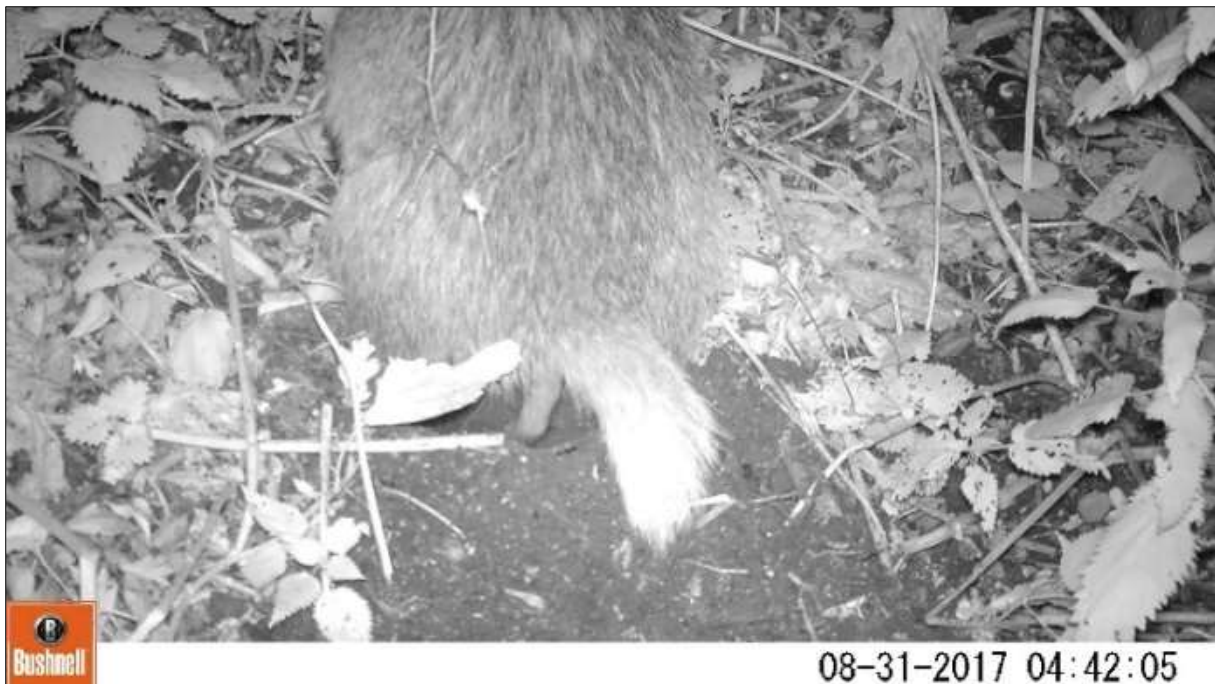

128

129 *Plate 1: M. meles* defecating into a dung pit at 04:42 © M Hughes & S. Brown 2017

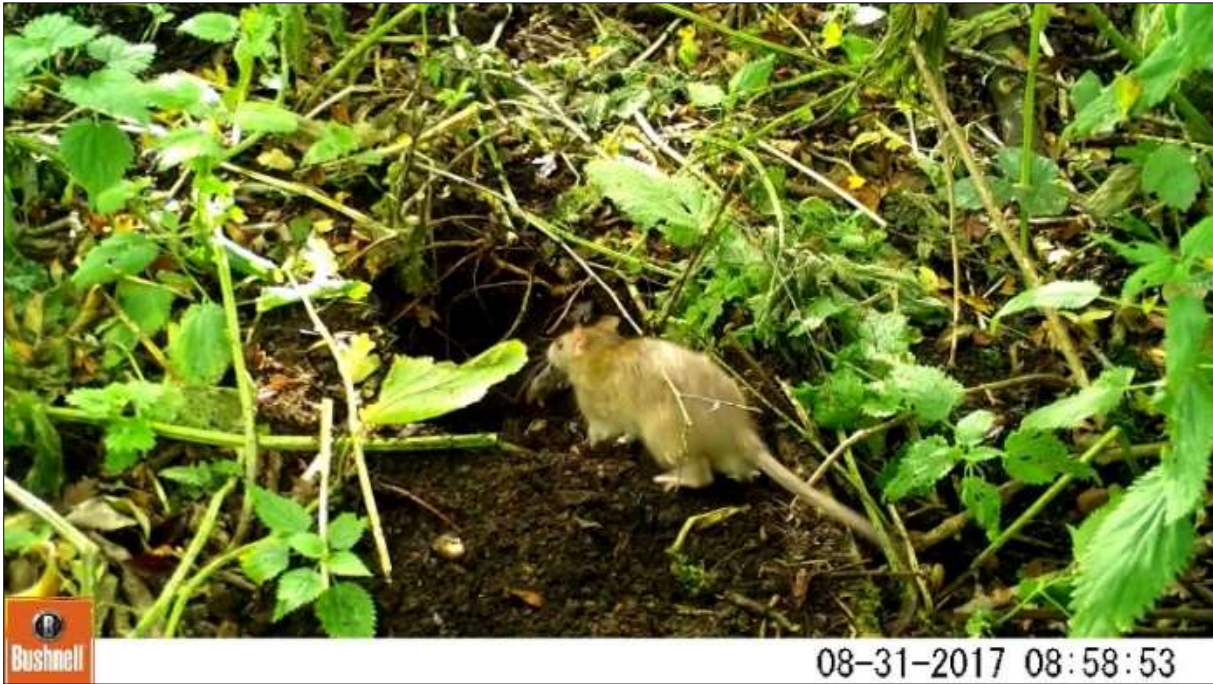

130

131 *Plate 2: R. norvegicus Harvesting faeces at same dung pit 08:58 © M Hughes & S Brown*  
132 *2017*

133

134 Discussion

135 *Seasonality*

136 Harvesting events were more frequent in the early part of the study (ISO weeks 35, 37 and  
137 38). This may be due to seasonal *M. meles* dietary changes affecting faecal contents from  
138 those typical of grain-based diet in late summer (**Plate 3**) to those typical of a fruit and worm-  
139 based diet in early autumn (Cheeseman & Neal 1998). This dietary change would reduce the  
140 abundance of grains within faeces, making the dung pits a less lucrative food source.

141

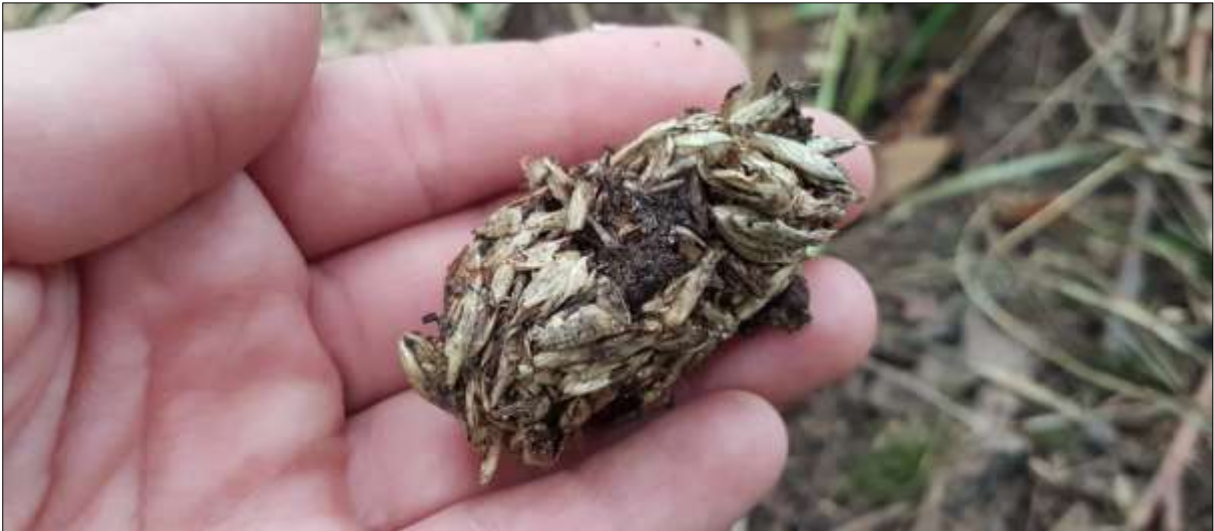

142

143 *Plate 3: M. meles faeces with high grain content* © Morgan Hughes 2017

144

#### 145 *Habitats*

146 The observations noted during this study may be more prevalent urban environments

147 (particularly in areas where feeding of wildlife takes place, such as in this study site) and

148 arable environments (where the growth, harvesting and storage of grain crops take place)

149 which are more likely to support larger populations of rodents than grasslands or woodlands

150 where there is no supplementary artificial food source. Availability of supplementary food

151 sources may also indirectly affect the prevalence of Harvesting behaviour due to its influence

152 on the variability of *M. meles* diet.

#### 153 *Disease Transmission*

154 Should the behaviour documented in this study prove to be widespread, there may be

155 implications to consider regarding disease transmission. For example, bovine tuberculosis

156 (*Mycobacterium bovis*) has been documented to be present in both *R. norvegicus* and

157 *A. sylvaticus* (Little et al., 1982; Delahay et al., 2001); *R. norvegicus* is known to carry other

158 diseases that are transmissible to cattle (Ward et al., 2006). While it has been acknowledged

159 that *R. norvegicus* is a potential vector for transmission of *M. bovis* in agricultural landscapes

160 due to the frequency of their contact with livestock and contaminated food stores (Delahay et

161 al., 2001), their potential to transmit diseases between social groups of *M. meles* in urban  
162 environments is little understood.

### 163 *Survey Efficacy*

164 Presence of faeces in dung pits is typically used as an indication of *M. meles* presence and  
165 activity, as well as social group size (Wilson et al., 1997). Current methods for analysing  
166 *M. meles* territories rely on bait marking (Delahay et al., 2000). The findings of this study  
167 indicate that in areas where *R. norvegicus* populations are more prevalent, the survey efficacy  
168 of *M. meles* activity (Reynolds & Harris 2005) and bait marking surveys (Delahay et al.  
169 2000) may be adversely affected by the Harvesting behaviour exhibited by *R. norvegicus* as  
170 described here, particularly in incidences where entire faeces are removed or dung pits are  
171 emptied. Current protocols suggest placing bait in late afternoon to reduce the consumption  
172 of bait by diurnal, non-target species, but there are no times stipulated for checking of latrines  
173 (Delahay et al. 2000), which is typically undertaken at the same time as the visit to place bait.  
174 The results of this study indicate that survey efficacy may be improved by undertaking  
175 checks of latrines as early as possible in the day in order to maximise the chance of finding  
176 faecal matter in dung pits, particularly at times of year when *M. meles* diet is grain-based.  
177 Current bait marking methodology (Delahay et al. 2000) suggests an optimal survey period of  
178 February - April, and a second survey period in September-October. Harvesting behaviour is  
179 more likely to take place during times of the year when faeces contain grains and are more  
180 solid. As such, is likely to be less of a constraint in October surveys. However, the provision  
181 of bait itself may trigger an increase in harvesting activity and make faeces more viscous and  
182 able to be removed.

183 *Limitations*

184 Equipment failure of unknown causes occurred on two occasions, resulting in loss of data.  
185 Intermittent failure of cameras to trigger has also been observed, which may contribute to the  
186 number of false negatives. When triggered, IR cameras used produce an audible click, which  
187 has been demonstrated by to be detectable by mammals (Meek et al. 2014), possibly causing  
188 mammals to alter their normal behaviour. Some Mustelidae are able to detect light with IR  
189 wavelengths of up to ~870 nm (Newbold & King 2009). The cameras used for this study use  
190 IR light of 850 nm. Individual *M. meles* have been observed by the authors to turn towards  
191 cameras when triggered. It is unknown whether the animals' response is to the light, the click,  
192 or to both (Meek et al. 2016). Ancrenaz et al. (2012) report that most high-end, passive IR  
193 sensors can detect animals as small as 100 grams within 2 m of the sensor. Trigger success  
194 rates of high-end cameras (Glen et al. 2013) using 1080p no-glow cameras with trigger  
195 speeds of 0.2–2.1 seconds to detect stoats (*Mustela erminea*) were up to 80 % successful,  
196 depending on the animal's speed. The stoat weighs 140 – 445 g, and is an appropriate  
197 analogue for *R. norvegicus* at 200-300 g (Mammal Society 2017).

198 *Recommendations*

199 A constraint to the study is the small sample size, which took place at a single site used by a  
200 single social group. Further study is required to ascertain whether this behaviour can be  
201 readily observed in other urban areas, agricultural areas and in non-anthropogenic habitats.

202 References

203 Ancrenaz, M., Hearn, A. J., Ross, J., Sollmann, R. and Wilting, A. (2012) *Handbook for*  
204 *wildlife monitoring using camera-traps* [online]. BBEC II Secretariat (ed.) Sabah, BBEC II  
205 Secretariat Available at:

206 <[http://www.bb.ec.sabah.gov.my/japanese/downloads/2012/april/camera\\_trap\\_manual\\_for\\_pr](http://www.bb.ec.sabah.gov.my/japanese/downloads/2012/april/camera_trap_manual_for_pr)  
207 [inting\\_final.pdf](#)>.

208 Cheeseman, C. and Neal, E. G. (1998) *Badgers*. London, Poyser Natural History.

209 Delahay, R. J., Cheeseman, C. L. and Clifton-Hadley, R. S. (2001) Wildlife disease  
210 reservoirs: The epidemiology of *Mycobacterium bovis* infection in the European badger  
211 (*Meles meles*) and other British mammals. *Tuberculosis*. **81**(1–2), pp. 43–49.

212 Delahay, R. J., Mallinson, P. J., Spyvee, P. D., Handoll, D., Rogers, L. M., Cheeseman, C. L.  
213 and Brown, J. A. (2000) The use of marked bait in studies of the territorial organization of the  
214 European Badger (*Meles meles*). *Mammal Review*. **30**(2), pp. 73–87.

215 Glen, Alistair, S., Cockburn, S., Nichols, M., Ekenayake, J. and Warburton, B. (2013)  
216 Optimising Camera Traps for Monitoring Small Mammals Alistair. *PLoS ONE*. **8**(6), p.  
217 e67940.

218 Hughes, M. and Brown, S. K. (2017) *Fibbersley LNR Badger Monitoring Report*. Walsall.

219 IBM Corp. (2016) IBM SPSS Statistics for Windows. Armonk, NY, IBM Corp.

220 International Organization for Standardisation (2017) Data elements and interchange formats  
221 – Information interchange – Representation of dates and times. **Standard N**(ISO-8601), .

222 Kruuk, H. (1978) Spatial organization and territorial behaviour of the. *Journal of Zoology*.  
223 **184**pp. 1–19.

224 Little, T. W. A., Thompson, H. V., Swan, C. and Wilesmith, J. W. (1982) Bovine  
225 tuberculosis in domestic and wild mammals in an area of Dorset. III. The prevalence of  
226 tuberculosis in mammals other than badgers and cattle. *Journal of Hygiene*. **89**(2), pp. 225–  
227 234.

228 Mammal Society (2017) Species Accounts. [online]. Available at:

- 229 <<https://www.mammal.org.uk/species-hub/full-species-hub/discover-mammals/>>.
- 230 Meek, P., Ballard, G., Fleming, P. and Falzon, G. (2016) Are we getting the full picture?  
231 Animal responses to camera traps and implications for predator studies. *Ecology and*  
232 *Evolution*. **6**(10), pp. 3216–3225.
- 233 Meek, P. D., Ballard, G. A., Fleming, P. J. S., Schaefer, M., Williams, W. and Falzon, G.  
234 (2014) Camera traps can be heard and seen by animals. *PLoS ONE*. **9**(10).
- 235 Newbold, H. G. and King, C. M. (2009) Can a predator see invisible light? Infrared vision in  
236 ferrets (*Mustelo furo*). *Wildlife Research*. **36**(4), pp. 309–318.
- 237 Reynolds, P. and Harris, M. (2005) *Inverness Badger Survey 2003* .
- 238 Roper, T. (2010) *Badger* .London, Harper Collins.
- 239 Thornton, P. S. (1988) Density and distribution of Badgers in south-west England—a  
240 predictive model. *Mammal Review*. **18**(1), pp. 11–23.
- 241 Ward, A. I., Tolhurst, B. A. and Delahay, R. J. (2006) Farm husbandry and the risks of  
242 disease transmission between wild and domestic mammals: A brief review focusing on  
243 bovine tuberculosis in badgers and cattle. *Animal Science*. **82**(6), pp. 767–773.
- 244 Wearn, O. R. and Glover-Kapfer, P. (2017) Camera Traps. *The International Encyclopedia of*  
245 *Primatology* [online],pp. 1–3. Available at:  
246 <<http://doi.wiley.com/10.1002/9781119179313.wbprim0281>>.
- 247 Wilson, G., Harris, S. and McLaren, G. (1997) Changes in the British badger population ,  
248 1988 to 1997. *People’s Trust for Endangered Species*.
- 249
